# Supplementary material
Source: publisher figshare collection journal article supplement (https://gsajournals.figshare.com/articles/dataset/_/13352078)
Supplement: Supplementary file 2 [file 1]

ID LR860656; SV 1; linear; mRNA; STD; VRT; 2118 BP.  
XX  
ST \* private  
XX  
AC LR860656;  
XX  
PR Project:PRJEB12265;  
XX  
DE Mugil cephalus follicle-stimulating hormone receptor, male form (FSHRY)  
DE mRNA, complete cds.  
XX  
KW .  
XX  
OS Mugil cephalus (flathead mullet)  
OC Eukaryota; Metazoa; Chordata; Craniata; Vertebrata; Euteleostomi;  
OC Actinopterygii; Neopterygii; Teleostei; Neoteleostei; Acanthomorphata;  
OC Ovalentaria; Mugilomorphae; Mugilidae; Mugil.  
XX  
RN [1]  
RA Seroussi E.;  
RT ;  
RL Submitted (12-JUL-2020) to the INSDC.  
RL ARO, Agricultural Research Organization, Institute of Animal Science,  
RL P.O.B. 6, Bet-Dagan, 50250, Israel  
XX  
CC ##Evidence-Data-START##  
CC DNaseq ::sample support SAMEA3719480  
CC ##Evidence-Data-END##  
CC ##Assembly-Data-START##  
CC Assembly Method :: GAP5  
CC Coverage :: 15X  
CC Sequencing Technology :: Illumina, HiSeq 2500  
CC ##Assembly-Data-END##  
XX  
FH Key Location/Qualifiers  
FH  
FT source 1..2118  
FT /organism="Mugil cephalus"  
FT /mol\_type="mRNA"  
FT /tissue\_type="fin"  
FT /note="predicted"  
FT /db\_xref="taxon:48193"  
FT CDS 1..2118  
FT /codon\_start=1  
FT /transl\_table=1  
FT /gene="FSHRY"  
FT /translation="MMTVTILVMLKFAMIKMEAASAPGFELGFRPGRETVLAKQTCFLV  
FT GPGAMAIPSNMSSSTQCLELKQTQIRVIPKGALTSLOHLRRLNILQNDLQSI SDLAFV  
FT GLPRLTYILISENVALERIGASAFSDLPPELVEITITKSRNLHFIHSDAFRNLMLKLRfmt  
FT ISYTGKIFPNFSQVHSTYNEFQLHLQENS DLKKVPANAFRGLCTKTIKKIWLTRNGIK  
FT EVASDAFNGTKMQRFLKGNRQLTHMSPNAFAGSSELEVLDISQ TALSSLP GSILGGLK  
FT RLIAESAKNLKKLP PPRFFTKLHQANLTYSSHCCAFQNMQRNKS RNNHNLCAIPEAKNE  
FT PFFYRAHCST SITCSPVPDDFNPCEDIMSAVPLRILIWIISILALLGN AVVVVLVLLSSR  
FT SKLTVPRFLMCHLAFADLCMGIYLAVIAAVDMLYRGKYYNHSIDWQ EGLGCKAAGFFSV  
FT FASELSVFTLTAITVERWHTITHALRLDRKLR LRHACIIMTAGWIFAAAAALLPTVGVS  
FT SYSKVSICLPM DVEDLV SQVYVVSLLLLNILAFLCVC GCYLSIYLTFRNPSSVPAHADT  
FT RMAQRMAVLIVTDFICMAPISFFAVSAALKTPLITVSESKVLLVLFYPINSCANPFLYA  
FT FFTRTFR R DFFFLAARFGLFKTRAQIYRTETSSCQQPAWTSSRSSRV TMYSLANTLSLD  
FT ACVDSQSSKSW"  
XX  
SQ Sequence 2118 BP; 464 A; 671 C; 503 G; 480 T; 0 other;  
atgatgacgg tgacgatact ggtgatgctg aagtttgcca tgataaagat ggaggcggcc 60  
tcggcacctg gctttgagct gggcttcaga cccggacggg agaccgtttt ggccaaacaa 120  
acctgcttcc tgggtgggacc cggggccatg gcgataccct ccaacatgtc cagcagcacc 180

|             |            |             |            |             |            |      |
|-------------|------------|-------------|------------|-------------|------------|------|
| cagtgccttgg | aactcaagca | gacacagatc  | agagtgatcc | ccaaggggtgc | cctcaccagc | 240  |
| ctgcagcacc  | tcaggagact | gaacatactg  | cagaatgacg | aactgcagag  | tatcagtgat | 300  |
| ctcgccttcg  | tcggcctccc | tcgtctcact  | tacatcttaa | tatcagaaaa  | tggtgcttta | 360  |
| gaaagaattg  | gagcttccgc | cttctctgat  | ctccctgaac | tcgttgagat  | aaccataaca | 420  |
| aagtcaagaa  | acctgcattt | catccactca  | gacgccttca | gaaacctcat  | gaaactaagg | 480  |
| tttatgacca  | tctcctacac | cggcctgaaa  | atctttccca | acttttccca  | ggtccactcc | 540  |
| acctacaatg  | aatttcagct | tcacctgcag  | gagaacagcg | acttaaagaa  | agtccccgcc | 600  |
| aatgccttca  | gaggcctctg | cactaaaact  | atcaagaaga | tatggctcac  | cagaaatggc | 660  |
| atcaaggagg  | tggaagtga  | cgctttcaat  | ggaacaaaga | tgcaaagact  | atttctgaaa | 720  |
| ggcaatcggc  | agcttactca | catgagtccc  | aacgccttcg | cgggttccag  | tgagttggaa | 780  |
| gtgcttgaca  | tctcccaaac | agcgctcagc  | tctctgccag | gctccatcct  | cgggggactc | 840  |
| aagagactga  | tcgcagagtc | agccaagaac  | ctgaagaagc | ttcctcctcc  | tcggttcttc | 900  |
| accaaactgc  | accaggccaa | cctgacgtac  | tcgtctcact | gctgcgcctt  | ccagaacatg | 960  |
| cagagaaaca  | aatcaaggaa | caaccacaac  | ctgtgcgcta | taccagaggc  | gaagaatgag | 1020 |
| cccttcttct  | acagggcgca | ctgctccacc  | tccatcacct | gcagcccggg  | gccggacgac | 1080 |
| tttaacccgt  | gtgaggacat | catgtccgct  | gtccccttac | gcatectcat  | ctggatcatc | 1140 |
| tctatcctcg  | cgctactggg | gaacgcagtg  | gttgctcctg | tattgttgag  | cagcagatcg | 1200 |
| aagctcaccg  | ttccccgttt | cctcatgtgc  | cacttggcct | tcgctgacct  | ctgcatggga | 1260 |
| atctacctgg  | cagtcatagc | agccgtagac  | atgttatatc | gtggcaagta  | ctacaaccac | 1320 |
| tccatagact  | ggcaggaggg | cttgggctgc  | aaggctgccg | gcttcttctc  | ggtgtttgcc | 1380 |
| agcgagctgt  | cggtgttcac | gttgacggcg  | atcaccgtgg | agcgctggca  | caccatcacg | 1440 |
| catgccctgc  | gcctggaccg | taagcttcgc  | ctgagacacg | cctgcatcat  | catgacggcc | 1500 |
| ggctggatct  | tcgccgcggc | ggccgcgctt  | ctgcccacgg | tcgggggtcag | cagctacagc | 1560 |
| aaagtgagca  | tctgcttgcc | catggatgtg  | gaggatctgg | tgtcccaggt  | ctatgtagtg | 1620 |
| tccctgctcc  | tcctcaacat | cctggccttc  | ctctgtgtgt | gcggctgcta  | cctcagcatc | 1680 |
| tacctgacat  | tcgcgaatcc | ctcttcgggtg | ccggcccacg | ccgacacgcg  | catgggtcaa | 1740 |
| cgcattggccg | tcctcatcgt | caccgacttc  | atctgcatgg | ccccgatctc  | cttcttcgcc | 1800 |
| gtctcggccg  | cgctcaagac | ccccctcatc  | accgtctcgg | aatctaaggt  | cctcctggtc | 1860 |
| ctgttctacc  | ccattaactc | gtgcgccaac  | cccttcctgt | acgccttctt  | caccgcgacc | 1920 |
| ttccggcggg  | acttcttttt | cctggcggtc  | cgcttcggcc | tgtttaagac  | tcgggcgcag | 1980 |
| atttaccgga  | cagagacctc | ttcctgtcag  | cagccagcat | ggacctcttc  | gaggagcagc | 2040 |
| cgcgtgacaa  | tgtactcctt | ggccaacacc  | ttgagcctgg | acgcgtgcgt  | agactcccag | 2100 |
| tcgtccaagt  | catggtag   |             |            |             |            | 2118 |

//

ID LR860657; SV 1; linear; mRNA; STD; VRT; 2118 BP.  
 XX  
 ST \* private  
 XX  
 AC LR860657;  
 XX  
 PR Project:PRJEB34342;  
 XX  
 DE Mugil cephalus follicle-stimulating hormone receptor, variant A2, female  
 DE form (FSHRX) mRNA, complete cds.  
 XX  
 KW .  
 XX  
 OS Mugil cephalus (flathead mullet)  
 OC Eukaryota; Metazoa; Chordata; Craniata; Vertebrata; Euteleostomi;  
 OC Actinopterygii; Neopterygii; Teleostei; Neoteleostei; Acanthomorphata;  
 OC Ovalentaria; Mugilomorphae; Mugilidae; Mugil.  
 XX  
 RN [1]  
 RA Seroussi E.;  
 RT ;  
 RL Submitted (12-JUL-2020) to the INSDC.  
 RL ARO, Agricultural Research Organization, Institute of Animal Science,  
 RL P.O.B. 6, Bet-Dagan, 50250, Israel  
 XX  
 CC ##Evidence-Data-START##  
 CC DNaseq ::sample support SAMEA5968614  
 CC ##Evidence-Data-END##  
 CC ##Assembly-Data-START##

CC Assembly Method :: GAP5  
 CC Coverage :: 15X  
 CC Sequencing Technology :: Illumina, HiSeq 2500  
 CC ##Assembly-Data-END##

XX  
 FH Key Location/Qualifiers  
 FH  
 FT source 1..2118  
 FT /organism="Mugil cephalus"  
 FT /mol\_type="mRNA"  
 FT /tissue\_type="fin"  
 FT /note="predicted"  
 FT /db\_xref="taxon:48193"  
 FT CDS 1..2118  
 FT /codon\_start=1  
 FT /transl\_table=1  
 FT /gene="FSHRX"  
 FT /translation="MMTVTILVMLKFAMIKMEAASAPGFELGFRPGRETVLAKQTCFLV  
 FT GPGATAIPSNMSSSTQCLELKQTQIRVIPKGALTSLQHLRRLNILQNDLQSIDLAFV  
 FT GLPRLTYILISENVALERIGASAFSDLPELVEITITKSRNLHFIHSDAFRNLMLKRFMT  
 FT ISYTGLKIFPNFSQVHSTYNEFQLHLQENSCLKKVPANAFRGLCTKTIKKIWLTRNGIK  
 FT EVASDAFNGTKMQRLFLKGNRQLTHMSPNAFAGSSELEVLDISQTALSSSLPGSILGGLK  
 FT RLIAESAKNLKKLPFRFFTKLHQANLTYSSHCCAFQNMQRNKSRRNNHNLCAIPEAKNE  
 FT PFFYRAHCSTSIITCSPVPDDFNPCEDIMSAVPLRILIIISILALLGNAVVLVLLSSR  
 FT SKLTVPRFLMCHLAFADLCMGIYLAVIAAVDMLYRGKYNHSDWQEGLGCKAAGFFSV  
 FT FASELSVFTLTAITVERWHTITHALRLDRKLRLRHACIIMTAGWIFAAAAALLPTVGVS  
 FT SYSKVSICLPMDEVLDLSQVYVVSLLLLNILAFLCVCGCYLSIYLTFRNPSSVPAHADT  
 FT RVAQRMAVLIFTDFICMAPISFFAVSAALKTPLITVSESKVLLVLFYPINSCANPFLYA  
 FT FFTRTFRRDFFFLAARFGLFKTRAQIYRTETSSCQQPAWTSSRSSRVAMYSLANTLSLD  
 FT ACVDSQSSKSW"

XX  
 SQ Sequence 2118 BP; 460 A; 675 C; 505 G; 478 T; 0 other;  
 atgatgacgg tgacgatact ggtgatgctg aagtttgcca tgataaagat ggaggcggcc 60  
 tcggcacctg gctttgagct gggcttcaga cccggacggg agaccgtttt ggccaaacaa 120  
 acctgcttcc tgggtgggacc cggggccacg gcgataccct ccaacatgtc cagcagcacc 180  
 cagtgccttg aactcaagca gacacagatc agagtgatc ccaaggggtgc cctcaccagc 240  
 ctgcagcacc tcaggagact gaacatactg cagaatgacg aactgcagag tatcagtgat 300  
 ctgcgcttcg tcggcctccc tcgtctcact tacatcttaa tatcagaaaa tgttgcttta 360  
 gaaagaattg gagcttccgc cttctctgat ctccctgaac tcggttgagat aaccataaca 420  
 aagtcaagaa acctgcattt catccactca gacgccttca gaaacctcat gaaactaagg 480  
 tttatgacca tctcctacac cggcctgaaa atctttccca acttttccca ggtccactcc 540  
 acctacaatg aatttcagct tcacctgcag gagaacagcg acttaaagaa agtccccgcc 600  
 aatgccttca gaggcctctg cactaaaact atcaagaaga tatggctcac cagaaatggc 660  
 atcaaggagg tggcaagtga cgctttcaat ggaacaaaga tgcaaagact atttctgaaa 720  
 ggcaatcggc agcttactca catgagtcct aacgccttcg cgggttccag tgagttggaa 780  
 gtgcttgaca tctcccaaac agcgctcagc tctctgccag gctccatcct cgggggactc 840  
 aagagactga tcgcagagtc ggccaagaac ctgaagaaac ttctctctcc tcggttcttc 900  
 accaaactgc accaggccaa cctgacgtac tcgtctcact gctgcgcctt ccagaacatg 960  
 cagagaaaca aatcaaggaa caaccacaac ctgtgcgcta taccagaggc gaagaatgag 1020  
 cccttcttct acagggcgca ctgctccacc tccatcacct gcagcccggg gccggacgac 1080  
 ttttaaccgt gtgaggacat catgtccgct gtccccttac gcatacctcat ctggatcatc 1140  
 tctatcctcg cgctactggg gaacgcagtg gttgtccttg tattgttgag cagcagatcg 1200  
 aagctcaccg ttccccgttt cctcatgtgc cacttggcct tcgccgacct ctgcatggga 1260  
 atctacctgg cggatcatagc agccgtagac atgttatatc gtggcaagta ctacaaccac 1320  
 tccatagact ggcaggaggg cttgggctgc aaggctgccg gcttcttctc ggtgtttgcc 1380  
 agcgagctgt cgggtgttcac gttgacggcg atcaccgtgg agcgctggca caccatcacg 1440  
 catgccctgc gcctggaccg taagcttcgc ctgagacacg cctgcatcat catgacggcc 1500  
 ggctggatct tcgcgcgcgc ggccgcgcct ctgcccacgg tcgggggtcag cagctacagc 1560  
 aaagtgagca tctgcttgcc catggatgtg gaggatctgg tgtcccaggc ctatgtagtg 1620  
 tccctgctcc tccatcaacat cctggccttc ctctgtgtgt gcggctgcta cctcagcatc 1680  
 tacctgacct tccgcaatcc ctcttcgggtg ccggcccacg ccgacacgcg cgtggctcaa 1740  
 cgcattggccg tccatcatct caccgacttc atctgcatgg ccccgatctc cttcttcgcc 1800  
 gtctcggccg cgctcaagac cccctcatc accgtctcgg aatctaaggc cctcctggtc 1860  
 ctgttctacc ccatcaactc gtgcgcgaac cccttctgt acgccttctt caccgcgacc 1920

```

ttccggcgagg acttctttttt cctggcgagg cgttcggcc tgtttaagac tcgggagcag      1980
atttaccgga cagagacctc ttctgtcag cagccagcat ggacctcttc gaggagcagc      2040
cgcgtagcaa tgtactcctt ggccaacacc ttgagcctgg acgagtgagt agactcccag      2100
tcgtccaagt catggttag                                     2118

```

//

```

ID      LR860658; SV 1; linear; genomic DNA; STD; VRT; 13155 BP.
XX
ST      * private
XX
AC      LR860658;
XX
PR      Project:PRJEB12265;
XX
DE      Mugil cephalus follicle-stimulating hormone receptor, male form (FSHRY),
DE      complete gene and flank.
XX
KW      .
XX
OS      Mugil cephalus (flathead mullet)
OC      Eukaryota; Metazoa; Chordata; Craniata; Vertebrata; Euteleostomi;
OC      Actinopterygii; Neopterygii; Teleostei; Neoteleostei; Acanthomorphata;
OC      Ovalentaria; Mugilomorphae; Mugilidae; Mugil.
XX
RN      [1]
RA      Seroussi E.;
RT      ;
RL      Submitted (12-JUL-2020) to the INSDC.
RL      ARO, Agricultural Research Organization, Institute of Animal Science,
RL      P.O.B. 6, Bet-Dagan, 50250, Israel
XX
CC      ##Evidence-Data-START##
CC      DNaseq                      ::sample support SAMEA3719480
CC      ##Evidence-Data-END##
CC      ##Assembly-Data-START##
CC      Assembly Method             :: GAP5
CC      Coverage                    :: 15X
CC      Sequencing Technology       :: Illumina, HiSeq 2500
CC      ##Assembly-Data-END##
XX
FH      Key                        Location/Qualifiers
FH
FT      source                      1..13155
FT                                  /organism="Mugil cephalus"
FT                                  /mol_type="genomic DNA"
FT                                  /isolation_source="male ERS1026629"
FT                                  /note="predicted"
FT                                  /db_xref="taxon:48193"
FT      CDS                        join(1000..1187,4307..4378,4499..4573,5100..5174,
FT                                  5282..5356,6242..6316,6636..6716,8223..8291,8393..8467,
FT                                  8848..9033,9149..9366,9507..9688,9786..9977,11024..11578)
FT                                  /codon_start=1
FT                                  /transl_table=1
FT                                  /note="fshry"
FT                                  /translation="MMTVTILVMLKFAMIKMEAASAPGFELGFRPGRETVLAKQTCFLV
FT                                  GPGAMAIPSNMSSSTQCLELKQTQIRVIPKGALTSLOHLRRLNILQNDLQSI SDLAFV
FT                                  GLPRLTYILISENVALERIGASAFSDLPPELVEITITKSRNLHFIHSDAFRNLMLKRFMT
FT                                  ISYTGLKIFPNFSQVHSTYNEFQLHLQENSDLKKVPANAFRGLCTKTIKKIWLTRNGIK
FT                                  EVASDAFNGTKMQRLFLKGNRQLTHMSPNAFAGSSELEVLDISQALSSLPGSILGGLK
FT                                  RLIAESAKNLKKLPPPRFFTKLHQANLTYSSHCAFQNMQRNKSRRNNHNLCAIPEAKNE
FT                                  PFFYRAHCSTSI TCSPVPDDFNPCEDIMSAVPLRILIIWII SILALLGNVAVVVLVLLSSR
FT                                  SKLTVPRFLMCHLAFADLCMGIYLAVIAAVDMLYRGKYNNHSIDWQEGLGCKAAGFFSV
FT                                  FASELSVFTLTAITVERWHTITHALRLDRKLRLRHACIIMTAGWIFAAAAALLPTVGVS
FT                                  SYSKVSICLPMDEVLDLVSQVYVVSLLLLNILAFLCVCGCYLSIYLTFRNPSSVPAHADT

```

|    |        |                                                             |
|----|--------|-------------------------------------------------------------|
| FT |        | RMAQRMAVLIVTDFICMAPISFFAVSAALKTPLITVSESKVLLVLFYPINSCANPFLYA |
| FT |        | FFTRTFRRDFFFLAARFGLFKTRAQIYRTETSSCQQPAWTSSRSSRVTMYSLANTLSLD |
| FT |        | ACVDSQSSKSW"                                                |
| FT | exon   | <1000..1187                                                 |
| FT |        | /note="fshry"                                               |
| FT | intron | 1188..4306                                                  |
| FT |        | /note="intron 1"                                            |
| FT | exon   | 4307..4378                                                  |
| FT |        | /note="exon 2"                                              |
| FT | intron | 4379..4498                                                  |
| FT |        | /note="intron 2"                                            |
| FT | exon   | 4499..4573                                                  |
| FT |        | /note="exon 3"                                              |
| FT | intron | 4574..5099                                                  |
| FT |        | /note="intron 3"                                            |
| FT | exon   | 5100..5174                                                  |
| FT |        | /note="exon 4"                                              |
| FT | intron | 5175..5281                                                  |
| FT |        | /note="intron 4"                                            |
| FT | exon   | 5282..5356                                                  |
| FT |        | /note="exon 5"                                              |
| FT | intron | 5357..6241                                                  |
| FT |        | /note="intron 5"                                            |
| FT | exon   | 6242..6316                                                  |
| FT |        | /note="exon 6"                                              |
| FT | intron | 6317..6635                                                  |
| FT |        | /note="intron 6"                                            |
| FT | exon   | 6636..6716                                                  |
| FT |        | /note="exon 7"                                              |
| FT | intron | 6717..8222                                                  |
| FT |        | /note="intron 7"                                            |
| FT | exon   | 8223..8291                                                  |
| FT |        | /note="exon 8"                                              |
| FT | intron | 8292..8392                                                  |
| FT |        | /note="intron 8"                                            |
| FT | exon   | 8393..8467                                                  |
| FT |        | /note="exon 9"                                              |
| FT | intron | 8468..8847                                                  |
| FT |        | /note="intron 9"                                            |
| FT | exon   | 8848..9033                                                  |
| FT |        | /note="exon 10"                                             |
| FT | intron | 9034..9148                                                  |
| FT |        | /note="intron 10"                                           |
| FT | exon   | 9149..9366                                                  |
| FT |        | /note="exon 11"                                             |
| FT | intron | 9367..9506                                                  |
| FT |        | /note="intron 11"                                           |
| FT | exon   | 9507..9688                                                  |
| FT |        | /note="exon 12"                                             |
| FT | intron | 9689..9785                                                  |
| FT |        | /note="intron 12"                                           |
| FT | exon   | 9786..9977                                                  |
| FT |        | /note="exon 13"                                             |
| FT | intron | 9978..11023                                                 |
| FT |        | /note="intron 13"                                           |
| FT | exon   | 11024..>11578                                               |
| FT |        | /note="exon 14"                                             |
| XX |        |                                                             |

|    |                                                                   |     |
|----|-------------------------------------------------------------------|-----|
| SQ | Sequence 13155 BP; 3558 A; 2970 C; 2741 G; 3886 T; 0 other;       |     |
|    | tcagctcttc atctcctctc gtccaactgc atttggtgga ctcatgcagg ctcatctccc | 60  |
|    | ttccatttct ctttggtgca gcagctgtgg gagagtgtat ctgtgtgtgt gcgtggccgt | 120 |
|    | gtcaggggct caaggctgca ttcttcttcc agcttcggaa taaatcaca agagcgccgg  | 180 |
|    | tcctccacat gaagttccca caacacacac acacacacac acacatacac acacacacac | 240 |
|    | ggagaggaga aattgaacat tttaaaagaa ggaaatctca aaaacagttt gccacggagg | 300 |

|             |             |             |             |             |             |      |
|-------------|-------------|-------------|-------------|-------------|-------------|------|
| cttgtgtacg  | tgtgcgcgca  | catgaacgca  | cagtgtcctt  | gcgaggtggc  | ggcacgtcct  | 360  |
| ggcgatgtgt  | gatgagccga  | gtagaaagga  | ttattatgtc  | cattgttatc  | cgactgtgct  | 420  |
| catcattcaa  | cgcaaatatg  | acacagaaga  | caaaacagat  | tcacacctgc  | gcggtctgca  | 480  |
| aacttatgtt  | tttgtgttcg  | atcgttgacc  | tgaagctaaa  | agggggggca  | gaaaaccgat  | 540  |
| caggtttcct  | actgtctgct  | atttactcct  | aaactgcaaa  | taacgcagac  | tcaactggaa  | 600  |
| accaagtaac  | aaaaaacaag  | tggaaaaagt  | gtttttctta  | aatcacagca  | tcctatcagg  | 660  |
| atgtaccgcg  | tgacgtgctg  | tgggggtttt  | acacggtaaa  | cacacacacg  | cacacacaca  | 720  |
| cacaaagcca  | agcagagaga  | cctcctacat  | cctcatgcac  | ccttgaagct  | tttcacacgc  | 780  |
| cccaaacatt  | caccgctgcc  | cagcagaaaa  | cgctcacat   | gtcctctgtc  | tgcgccctga  | 840  |
| gtgagtaacc  | ggaccaaata  | cgctcgtata  | aaacgctggc  | gccggtggaa  | gcctttgtct  | 900  |
| gcatgtgaac  | acagcggggg  | tggaggcaaa  | atcgttgcaa  | aagacacgaa  | agaagaagga  | 960  |
| aataggtgaa  | aacacagttt  | ggacgcagac  | aggctgaaga  | tgatgacggg  | gacgatactg  | 1020 |
| gtgatgctga  | agtttgcgat  | gataaagatg  | gaggcggcct  | cggcacctgg  | ctttgagctg  | 1080 |
| ggcttcagac  | ccggacggga  | gaccgttttg  | gccaaacaaa  | cctgtctcct  | ggtgggaccc  | 1140 |
| ggggccatgg  | cgataccctc  | caacatgtcc  | agcagcaccc  | agtgtctgtg  | agtacgcaaa  | 1200 |
| cacacaaagc  | gaagcgtgtc  | ctgcagccat  | tgaagggtga  | gaaacaaatc  | cctcgaaggc  | 1260 |
| tagtgtagta  | tcaagttatg  | ttgtggaatt  | aaaggtaata  | ctgtttaact  | gattccatt   | 1320 |
| ctgtttggca  | tttgtaccga  | aaacaggatg  | agactttatg  | tatcattcct  | gacagcacca  | 1380 |
| ccccttatcg  | accctaata   | gaagtgcatt  | cagcatttat  | ttgtcgttgg  | ttctttactt  | 1440 |
| ttctgtatcc  | gctgtaagat  | ttttttcata  | aaagtctaca  | gcatgcagcc  | attttgggag  | 1500 |
| acagagaaa   | gtcaagactg  | cagcgggaaga | gcccagagata | tgctgacttt  | ttctcccgag  | 1560 |
| ccaagctccg  | aaaacctcct  | gatcccat    | gttcaataat  | ttatttcggc  | attccttcat  | 1620 |
| ccctttgtga  | aacgctcaca  | tctctcaaac  | tcttccaccc  | cggcttggtg  | cagaccctat  | 1680 |
| gaagccgttc  | agggttattt  | ctcagaactt  | tagcgcgttt  | gctttgcagc  | tacgggggtc  | 1740 |
| gtggtcagaa  | tatgatgagg  | agcgaatggg  | ctttaatgtg  | tgaaatgtga  | accgtaacct  | 1800 |
| acactcttaa  | aaatactacc  | tcccattgcc  | cgtctcatag  | cgatgcaggt  | taaggggaca  | 1860 |
| ttcaatattt  | acaactaata  | atctcatttt  | gtgtgcatgc  | ataatcattt  | agactttccc  | 1920 |
| ctctaatacct | ccgttatctc  | cccgtggatg  | aattttgcac  | ttcacccctg  | tcagttccgg  | 1980 |
| ttttattaaa  | cattcattca  | taatgcatgt  | caagcatgcg  | tgttcatcct  | cagcattttg  | 2040 |
| cggtgcaagc  | acacctactg  | tcactgtttg  | ccatgcggta  | tcctcagctt  | aaagatgccg  | 2100 |
| agtctcgtga  | gcaagagaaa  | gttttctctc  | tgaacaaaaa  | ctgtaacctc  | ccaggttaca  | 2160 |
| gtattcctct  | tcgttaaatt  | gctgcactgc  | acacaagggc  | catttggtga  | gccgctttgt  | 2220 |
| tgccactagt  | tggacccctg  | atggctgctt  | ttcagatcca  | gttcgtttaa  | cctgcacttc  | 2280 |
| gatcactctg  | tgttgttcag  | ctgttcagtt  | tagagaaccg  | gttcaggaaa  | aactagtagt  | 2340 |
| ttcactccta  | gctctaccta  | gctacctage  | ctccgtgcta  | atatttgctc  | gcctggtttt  | 2400 |
| cgattctgct  | ggtatgatta  | gttattaact  | cctgtgtaga  | aagctagctg  | gctattggct  | 2460 |
| acggtctttg  | caactttttg  | gtccagacac  | agggtgacgtg | aggcaatgtc  | ccacttggcc  | 2520 |
| ttcttcaccg  | attgctgggt  | cgttcattcg  | ttcgcggggg  | cagaagcttc  | aggagggagg  | 2580 |
| tccagacggc  | cctctccctg  | ctcctctgga  | ggaaccccc   | aggctaggca  | ggagatgtaa  | 2640 |
| tccaaccatc  | gtgtcctggg  | ccaacctaga  | ggcctccgtc  | cggcggggaca | tgccgaaac   | 2700 |
| acctctaacc  | ggagggtgcc  | tgaaggcatc  | cttatcagat  | gcctgaaaca  | cctcaactga  | 2760 |
| ctcctcttga  | tgtggaggag  | cagtggttct  | actctgagct  | cctcccgtat  | gtccaaattc  | 2820 |
| cttaccttat  | acctggtcac  | caagcaaagg  | aaacttcgtc  | cgtttgatc   | cgcgatcttg  | 2880 |
| ttctttcggg  | cattacccaa  | agttcatggc  | cataggtgca  | ggttagaacg  | tagatcaacc  | 2940 |
| agtaaattga  | gagctttgcc  | tttcggctta  | gctctctctt  | caccaaacag  | actggatgtc  | 3000 |
| gacaggtggg  | tgctgtttaa  | tgccggcctt  | tgcaattttt  | ttcttttttt  | tttgcattcat | 3060 |
| gttgccctgag | tcatagcact  | gctgtccatg  | acttgccctt  | gtgaattaaa  | tgcaaatgag  | 3120 |
| tctcgcaatc  | ggttagcact  | gatgcctccc  | agcgagaagg  | ttctggttcg  | agtccagctc  | 3180 |
| agacctttct  | gggtggaggt  | tgtatgttct  | ccctgtgtct  | gcgtgggttt  | tctccaggta  | 3240 |
| ctccggtttc  | ctcccacctc  | caaagacatg  | ctcgttaggc  | taattggtaa  | ttccaaattg  | 3300 |
| cccctagatg  | tgagtctgtg  | ttagccctgt  | gatgggcttc  | caaccaccct  | agtgaggata  | 3360 |
| agtggtagta  | gaagatgaga  | tgtaatgaga  | tcatcaagga  | agtgcctaag  | caatgacgat  | 3420 |
| tacacgggaa  | caccatgcca  | aaatatgaca  | ttccgaaaaa  | ggctgaattc  | aacccccattc | 3480 |
| aaaaggaaaa  | gataaatatt  | catggttttg  | cgtgacacta  | catatgaagc  | gcctacctgc  | 3540 |
| agctgtctaa  | ctcagcccga  | atactagaag  | cagggtggata | cagcttgcca  | aagtatagtt  | 3600 |
| tttactcctt  | gatgtagtta  | cccttggtatg | agaaagctta  | gttttttatg  | ttatgagatt  | 3660 |
| gacatagggc  | tcatattttag | catacagaca  | aaagagcgca  | tgtcaaggta  | tccgacttgt  | 3720 |
| catccaaacc  | tgtgccagac  | tctctgcgtg  | ttatgtttca  | aggccgtgca  | agcgttgacg  | 3780 |
| acctttagtt  | cttgacacag  | tggcgcagag  | ctgaagttgt  | agccatcagg  | ggtccaacac  | 3840 |
| ctgatgtttt  | ggttgtttat  | gcatctggaa  | agaatctcaa  | ggcctcgaag  | agaaagggga  | 3900 |
| gggttgcat   | aaagattaga  | ttcacctgaa  | gcgtttgcag  | gaacatgcat  | atgatcgtgc  | 3960 |
| atgaggacag  | ctttgctatg  | caagtcataa  | acgtactttg  | tcgtagaagt  | agtgactatt  | 4020 |
| cccaacatat  | gcatgtgatc  | aactgcgtgt  | gttctcatcc  | gttctgctca  | aaggtcaagg  | 4080 |
| ctaaggaaca  | gcagggatat  | ttacaagtat  | gcagcagctg  | atggccattt  | caaaagtgat  | 4140 |

|             |             |             |             |             |             |      |
|-------------|-------------|-------------|-------------|-------------|-------------|------|
| tcacaacagc  | cagatgcaaa  | aaagctcggg  | gtgttgtaca  | gttcctaaac  | acgatagaca  | 4200 |
| ccgttttgtt  | cctgcatgaa  | aagaaaatgc  | gaggaactag  | cctcctttat  | tagtctccac  | 4260 |
| tcatgattgt  | ccgctgtaaa  | tttgtaacgt  | gtttctgcat  | ccacagggaa  | ctcaagcaga  | 4320 |
| cacagatcag  | agtgattccc  | aaggggtgcc  | tcaccagcct  | gcagcacctc  | aggagactgt  | 4380 |
| aagcttttagt | gaaattgaca  | aaaagaaata  | tctgtgtcaa  | tatctgtacc  | ggcatttgca  | 4440 |
| tccttttttt  | cttttctttt  | tcgtcttcta  | tccactactt  | ccttccttcc  | aacttttagga | 4500 |
| acatactgca  | gaatgacgaa  | ctgcagagta  | tcagtgatct  | cgccttcgtc  | ggcctccctc  | 4560 |
| gtctcactta  | catgtgagtg  | tgtggatttc  | taggagtcgc  | tacatgcaga  | gtattttatc  | 4620 |
| caacatgctt  | gcgtgttttag | tcttttaaaat | ggaacaaaac  | aataggatcg  | cccaaatagc  | 4680 |
| tgggaagtaa  | gctcggcaaa  | catggtggag  | acaaaataca  | gccttttagac | tttatttgct  | 4740 |
| ccagaagaga  | gatttgtttc  | cacttgactg  | tacatgtatt  | aatcacaaca  | taagatcgga  | 4800 |
| caagacaaga  | gagtgtctcaa | atcaagaaca  | gcttatggca  | ttggacatta  | aatgaggtgg  | 4860 |
| acatagatgg  | cagacacagg  | ggagaagaaa  | gaagtctggt  | atttaggggtg | gatagggctg  | 4920 |
| caggtattaa  | gctcttttacc | gtgcaagctc  | gtcagaatth  | aatcatccgg  | tatctgcaac  | 4980 |
| ctgatgattt  | tgtgtgatag  | gaattaatth  | tgtcccactg  | gtgactgaaa  | gcatgggtgga | 5040 |
| ggaacgtcta  | acagtataat  | gtttaaacat  | actacgtgtc  | ttgtctttgt  | ctgccccagc  | 5100 |
| ttaatatcag  | aaaatgttgc  | tttagaaaga  | attggagctt  | ccgccttctc  | tgatctccct  | 5160 |
| gaactcgttg  | agatgtaagt  | ataactgaca  | gagtaagggg  | gtaaggagag  | tggtgagacc  | 5220 |
| ctttaatctc  | aagaccagag  | atataaacta  | atgagtgcatt | tattgactgt  | cctcctttca  | 5280 |
| gaaccataac  | aaagtcaaga  | aacctgcatt  | tcattccactc | agacgccttc  | agaaacctca  | 5340 |
| tgaaactaag  | gtttatgtga  | gtactcagtc  | aacatatata  | gtttgtgttt  | ttcagactgg  | 5400 |
| ttatgagtcc  | gatatgggcc  | atgggtgaca  | ggcctacttc  | tgaatggcca  | gagacatcat  | 5460 |
| tttttaatta  | gcttggtacc  | ccggaagaga  | aatcaaattgt | cacacttaat  | acagagggtt  | 5520 |
| aaatacacat  | atatatatat  | attatttttt  | tccccactg   | aattacttac  | ccactatttc  | 5580 |
| agataagcca  | cgctgagtaa  | aattttcaac  | gtaaccattc  | gtaaagggaa  | gtgaactaat  | 5640 |
| gtccttaaaa  | gatgttatca  | taactgtcac  | tggtgtatth  | gtcccattht  | atgtaaactg  | 5700 |
| ggacactggg  | acacggggagt | ctgtgctgat  | ggacatctct  | tacttctaaa  | caagggcaca  | 5760 |
| gtagcacagg  | aaaacttatg  | ttgtaatttg  | ttggtaattt  | gttttaagata | aggtttatth  | 5820 |
| ttttctacat  | tcaatgaaaa  | aagcttataa  | aaataaaaaa  | aacaagctag  | tgaaatgtct  | 5880 |
| tgatcactat  | cgggagggat  | ttcttattga  | atgaagtgca  | gatattttatt | gtaccaagag  | 5940 |
| gatgacttta  | atggccccag  | ttaaatttta  | acgtgtcagc  | aaacacctgc  | aaaattttcta | 6000 |
| aggctcagct  | gatgttagca  | tcctgaatat  | gatatgattt  | atcctgctaa  | ttttactgct  | 6060 |
| tatcttaaac  | cagtgtctcaa | aggattttgt  | ttagtttttt  | tcaaactgaa  | agcttgtata  | 6120 |
| tcctaacgat  | caacgtttta  | caggctgaga  | aacagacact  | aaatgtcttc  | atthttgttt  | 6180 |
| atctaagtga  | ataagtgaat  | gtaattacat  | ttgaggthtc  | tttcctcccg  | tctcgtcaca  | 6240 |
| ggaccatctc  | ctacaccggc  | ctgaaaatct  | ttcccaactt  | ttcccaggtc  | cactccacct  | 6300 |
| acaatgaatt  | tcagctgtga  | gtctcactac  | tagatagaaa  | cggactggaa  | acacatgcag  | 6360 |
| agatacgcac  | ccacacgctg  | ctcttggtga  | cgcttctgca  | cactaaaata  | tgactagagg  | 6420 |
| aaatcacacc  | aacatataga  | gtatacaaca  | ctgcagtcac  | gatctatgca  | atgagaagcg  | 6480 |
| ctaacagatt  | actcaagcta  | tctaccttct  | agcttgggtc  | tagtatctaa  | agcacacata  | 6540 |
| ctgttcatct  | gtcatttttt  | ttccacttga  | aaattctact  | gttttctcca  | cagtatttct  | 6600 |
| tatttattgt  | gtgtttttga  | tcttttgaca  | ctcagtcacc  | tgcaggagaa  | cagcgactta  | 6660 |
| aagaaagtcc  | ccgccaatgc  | cttcagaggc  | ctctgcacta  | aaactatcaa  | gaagatgtaa  | 6720 |
| gggcttcagc  | gcattttttt  | tttttttttt  | tattatttct  | tatttttttc  | ttggtttgtt  | 6780 |
| ttttcttggt  | tttcagaaat  | gcaccacaac  | cctcacacac  | atctgagtg   | gcatttcatg  | 6840 |
| cacggtgatg  | aatgttttct  | gaaatgctct  | ctgccctctt  | cgctggctgc  | acttttctct  | 6900 |
| gcttttctcc  | tgcttttctc  | aaattctgca  | gaatcactct  | tacttgtgtt  | gatcagcttt  | 6960 |
| tattttccta  | tcctttttaag | ctgcagatat  | tgaatcctgc  | ttaaactgac  | ttgctgaatc  | 7020 |
| acactctgtg  | ttagactgtt  | agagagcgat  | cgcaaacatt  | tactaagtht  | ccttttaaat  | 7080 |
| acataattatt | attgtagact  | tcattcagtht | aacagaagag  | atatttctctg | ttgaagactt  | 7140 |
| ttatcaactg  | ttggagatac  | taagatgtaa  | acacattcac  | tatttatcaa  | aatgttcaga  | 7200 |
| aacattctgt  | aaatgttctc  | agtaaaaaaca | ctgagctgct  | cttcgattac  | tactgacata  | 7260 |
| taaataatag  | cctattttcac | actgcttttt  | tattattttac | ttctactcta  | gtgagattaa  | 7320 |
| tattttttatt | ttaaaccagc  | tgcaacatta  | aaatgcagtc  | tattacattc  | agtaaaaaata | 7380 |
| ataatacaat  | tttacagtat  | agctactgta  | tgataaacatt | tgacaagaca  | ttaacagatt  | 7440 |
| ctgtcacgth  | tgttgaaaaat | atthccttca  | cttttacatg  | aagatctaaa  | gctaagctat  | 7500 |
| ggctagcagc  | aggttagcct  | agctcgthtt  | ttttttttta  | ctatctaaaa  | aagcactgth  | 7560 |
| tgtatttttt  | tcactcacia  | gttgttgttt  | tgcttgtcag  | ttaatgagtc  | ttggtggtag  | 7620 |
| gtaggthttt  | ctaagctgtg  | gactaagtca  | gacgagctgt  | acttctctca  | tttttgctta  | 7680 |
| aatatatagc  | taagctatag  | ctagcagcag  | gttagcctag  | ctcgthtttt  | tttttttttt  | 7740 |
| ttactatct   | aaaaaagtag  | tttgtatttt  | tttactcac   | aaaaacaata  | cagtgttttt  | 7800 |
| atgggtgagth | tttagagatg  | aattaaaaaa  | aaacaaaaaa  | aaaaaaaaaa  | caacagatat  | 7860 |
| tggcaaagct  | acaccagagg  | agcatcaatc  | tcatataggc  | taactctgat  | atgtctcata  | 7920 |
| tgatgtatgt  | caaattccac  | ggtaaagctt  | tgaatttata  | gctttgaatt  | tataattttt  | 7980 |

|             |             |             |             |             |             |       |
|-------------|-------------|-------------|-------------|-------------|-------------|-------|
| tacatgttaa  | agtttgaacg  | tgtctcacga  | attccatggt  | aatcagctaa  | aagggaggaa  | 8040  |
| tttccaaatt  | tcttagcggt  | tttcacttga  | aatccggtgc  | atttctgtcg  | agtcggtgaa  | 8100  |
| agagaacaaa  | agaggtgcaa  | aggctaaaaat | tagcgctcgag | agatcagaac  | agaagtttgc  | 8160  |
| tgctggaaat  | gttgtgcgtt  | ggagccacgc  | gactgtaact  | tggcgtctct  | tgctattgac  | 8220  |
| agatgggtca  | ccagaaatgg  | catcaaggag  | gtggcaagt   | acgctttcaa  | tggaaacaaag | 8280  |
| atgcaaagac  | tgtgagtcac  | aggcagagac  | acaattacaa  | gctgaagata  | tataaaaaaa  | 8340  |
| aaataaaaaa  | gtccgcattc  | aaaatatctt  | gccctctttc  | ttttccctt   | agatttctga  | 8400  |
| aaggcaatcg  | gcagcttact  | cacatgagtc  | ccaacgcctt  | cgcgggttcc  | agtgaagtgg  | 8460  |
| aagtgtctga  | agcatgacat  | cttgatgtaa  | ctcatgccca  | catgattcac  | cctgtctcatc | 8520  |
| atcacttgac  | ttaggatgat  | gcaggagaaa  | cccagaatac  | atatggggag  | gctaaataaaa | 8580  |
| accttgtaga  | aatacaaaaat | atacagagag  | cattttttatt | ttttttttca  | ttgctgtgat  | 8640  |
| gtttttgtct  | tcgttccctg  | caattacttg  | gcaatcatat  | cattttttttt | tttctgggtgt | 8700  |
| atttttgtgt  | ggattagttt  | gtcctgtgag  | aaataagttt  | ttatcaactg  | atcttaggtc  | 8760  |
| aaatctaaat  | agaaaaacag  | ataacaagta  | gttgataaaa  | aaataaaaaat | aaaaatcttg  | 8820  |
| ctgctgtgtt  | tctccttgct  | cccacagtga  | catctcccaa  | acagcgtcca  | gctctctgcc  | 8880  |
| aggctccatc  | ctcgggggac  | tcaagagact  | gatcgcagag  | tcagccaaga  | acctgaagaa  | 8940  |
| gcttcctcct  | cctcgggttct | tcaccaaact  | gcaccaggcc  | aacctgacgt  | actcgtctca  | 9000  |
| ctgctgcgcc  | ttccagaaca  | tgcagagaaa  | caagtgcgcg  | tctcctgctc  | gactgttata  | 9060  |
| gctcatgggt  | tacctggaaa  | gaatgggaaa  | aaaaaaaaaa  | cacaaatata  | taggttggtc  | 9120  |
| acgagtactg  | tacttggtgtg | tgtgctagat  | caaggaaaca  | ccacaacctg  | tgcgctatac  | 9180  |
| cagaggcgaa  | gaatgagccc  | ttcttctaca  | gggcgcactg  | ctccacctcc  | atcacctgca  | 9240  |
| gcccggtgcc  | ggacgacttt  | aaccctgtgtg | aggacatcat  | gtccgctgtc  | cccttacgca  | 9300  |
| tcctcatctg  | gatcatctct  | atcctcgcgc  | tactggggaa  | cgcagtgggt  | gtccttgatat | 9360  |
| tgttgagtat  | gaaatgcttc  | tcttgcatth  | tatttcaatc  | atactgtgca  | tgcaattgtg  | 9420  |
| tatataatct  | tgtatttcct  | tgtgtggtag  | tagaaatagt  | agtaaagtgt  | ccttttttgaa | 9480  |
| tgctcttttc  | tttcctccat  | tgtcaggcag  | cagatcgaag  | ctcaccggtc  | cccgtttcct  | 9540  |
| catgtgccac  | ttggccttcg  | ctgacctctg  | catgggaatc  | tacctggcag  | tcatagcagc  | 9600  |
| cgtagacatg  | ttatatcggt  | gcaagtacta  | caaccactcc  | atagactggc  | aggagggcct  | 9660  |
| gggctgcaag  | gctgccggct  | tcttctcggt  | gtgtacgcga  | gagctgactt  | catggctcac  | 9720  |
| ataacaggca  | gcagctttgg  | tcgcctctga  | gcggtaaacg  | aacgttgtct  | gtgtgtcacg  | 9780  |
| tgcagggtgt  | tgccagcgag  | ctgtcgggtg  | tcacgttgac  | ggcgatcacc  | gtggagcgct  | 9840  |
| ggcacaccat  | cacgcatgcc  | ctgcgcctgg  | accgtaagct  | tcgcctgaga  | cacgcctgca  | 9900  |
| tcacatgac   | ggccggctgg  | atcttcgcgc  | cggcgggccg  | gcttctgccc  | acggtcgggg  | 9960  |
| tcagcagcta  | cagcaaagt   | ggtgttaaat  | ttagctagt   | catgttcctc  | tcagaattgg  | 10020 |
| ctcaggctcct | tttagtttgg  | gatgcaaaaat | ggagaataga  | atagaataga  | ataatctatc  | 10080 |
| agttacacac  | tgaatcaaac  | aactgactga  | cacatgaaag  | gaaatgtgaa  | tgaatgtga   | 10140 |
| ttaaaaagta  | taaaacaatc  | tcaataatta  | gaatcccaat  | tagcctaata  | aaatatcttg  | 10200 |
| tgtgagaaga  | aaaggcataa  | tctcactact  | atgaaactgg  | aaccttatta  | tatattatta  | 10260 |
| ttgttccaat  | ggccagaagg  | tcttttttaa  | caaagcttat  | agtatagtat  | atattatagt  | 10320 |
| atatagtata  | gttatgatgc  | actgagcatc  | atccctcagc  | atcatcctcc  | attttctctt  | 10380 |
| ctctggcacc  | gagctcctgt  | cctctaatac  | cttataatta  | cttttctact  | gctaaccctt  | 10440 |
| cttcttcttg  | tggggatctt  | tggcctggag  | tgctgcatac  | ctggcttatg  | gagctccaaa  | 10500 |
| ctacatctgc  | tgtcttggtc  | tcacagcct   | gcccagtcct  | tttggccccc  | tgcagttatc  | 10560 |
| cactcctacc  | tggatgaaca  | attctccaac  | ctgcccata   | ttcctcttac  | atgctcaaac  | 10620 |
| tgtcacataa  | cgtcatcagc  | tatatattgt  | attattagat  | tctacatgtt  | tgtgtacgat  | 10680 |
| aatatgaatt  | gaattgaaat  | tgaagatgga  | gattgtagga  | ttacacagat  | agtgtgcaaa  | 10740 |
| ctggaatgag  | ggaagcctgc  | actggctgtt  | tcagagtgt   | gcttctgtgt  | tgcaccttgg  | 10800 |
| aacttttttg  | atagtatttg  | acaatatgtg  | aacaaatctg  | aactgcaata  | aacgcacatt  | 10860 |
| taaatgtgct  | ctttctgttt  | ttactcaact  | gcaacatgtt  | tagttgaggt  | caacgtactg  | 10920 |
| ctcgtttcag  | cttcttagca  | ggaagacttt  | tagcccatgt  | tatggagtgg  | aaatggagt   | 10980 |
| aactaggctt  | actctgtttt  | tgtatatgtg  | tctgttcgtg  | caggtgagca  | tctgcttgcc  | 11040 |
| catggatgtg  | gaggatctgg  | tgtcccagg   | ctatgtagt   | tcctgctcc   | tcctcaacat  | 11100 |
| cctggccttc  | ctctgtgtgt  | gcggctgcta  | cctcagcatc  | tacctgacat  | tcgcgaatcc  | 11160 |
| ctcttcgggtg | ccggcccacg  | ccgacacgcg  | catggctcaa  | cgcagtggccg | tcctcatcgt  | 11220 |
| caccgacttc  | atctgcatgg  | ccccgatctc  | cttcttcgcc  | gtctcggccg  | cgtcgaagac  | 11280 |
| ccccctcatc  | accgtctcgg  | aatctaagg   | cctcctgggtc | ctgttctacc  | ccattaactc  | 11340 |
| gtgcgccaac  | cccttctcgt  | acgccttctt  | cacccgcacc  | ttccggcggg  | acttcttttt  | 11400 |
| cctggcggt   | cgcttcggcc  | tgtttaagac  | tccggcgag   | atttaccgga  | cagagacctc  | 11460 |
| ttcctgtcag  | cagccagcat  | ggacctcttc  | gaggagcagc  | cgcgtgacaa  | tgtactcctt  | 11520 |
| ggccaacacc  | ttgagcctgg  | acgcgtgcgt  | agactcccag  | tcgtccaagt  | catggtagac  | 11580 |
| caaatcgcat  | gagtggattt  | gtgcttcgtt  | tgccttcttg  | aagatgtttc  | acctgttatc  | 11640 |
| caggaggctt  | ctaggactag  | atgagaaaaca | agagtgtctga | ctttcatcca  | aatatccaca  | 11700 |
| gaagacgcac  | attcccctgg  | tttgtgaaca  | gaatgattct  | attttatctc  | cacacaaaag  | 11760 |
| ctattttctc  | tcaggcaaa   | aagaaggcta  | gctctgaagg  | acataaggca  | gtctttaatg  | 11820 |



|            |            |            |            |             |            |       |
|------------|------------|------------|------------|-------------|------------|-------|
| cacgaacacc | tgtgttcaac | atgcagctct | cgaggtgatt | tattttcaag  | gctgcatgca | 11880 |
| gcaggggtgt | acaaacacct | tttgatgtat | ctgccgagtt | tttgggcacg  | aaaagaaatc | 11940 |
| atacctgcat | accgctgtct | tatccctatt | tctgctttaa | ttccacgtgg  | acattgcaga | 12000 |
| gtttcaagct | cagtgtatct | gacctcagat | ggacagcaac | acagcgaaga  | cacagtgtcc | 12060 |
| agtgtcctcc | ttaaaccctg | tgatccacgg | gcaaaaacac | tgtagcaatc  | caagaaaaga | 12120 |
| aagctacgga | agaactgcgg | atagtttgat | cggatctagg | tcaaacagct  | gtcccagata | 12180 |
| cccctgtgtt | tgttttaact | tgattggagt | gccagatggg | cgaggttctc  | cgcaacgtta | 12240 |
| tttagaagta | aaactagaaa | gagtagacga | tgtagtgaac | tggtgatttc  | attcttatgc | 12300 |
| aagaaacgcc | atccatctgg | tgtcccgaga | taacaaaaca | aaccactctg  | aaaacagttt | 12360 |
| aacaaatgct | ttgggctagg | gacatcagca | tatgcacgac | atgaacagtc  | tgactggatg | 12420 |
| atcttcattc | agattaatac | agcagagacc | tgctgattga | taatctcctc  | atacactcag | 12480 |
| tctcctgtcc | tccaaatcca | ctaacacttt | agcatctctt | tttcatttaa  | ttctatTTTT | 12540 |
| tattttatTT | tttatggagg | acctacagtt | atctctgaag | actaattgtg  | catgtagttt | 12600 |
| gtaaacagcg | cctcactttt | tatatctatg | tgttgtgtac | aagatgtatc  | tttggtatgt | 12660 |
| ttttttttat | gtcattttat | aaagctgctt | atttcatcct | ttccacctga  | gtgcattttg | 12720 |
| cgtgacgaat | gcatgatgag | ttgtggcgaa | aggaaaaact | caaacacaca  | cgtgtgcata | 12780 |
| attgagccgc | ctttatctag | caccgctgtc | cttcggagca | tccaaagctt  | tcaaggacaa | 12840 |
| agtgaccaca | cacaaaaatt | tgctccatgt | atcaaggtag | gttggtgtgg  | gaggagagac | 12900 |
| tacacagctg | ctctctctgc | ttattacagg | aggatggata | ttgcagctag  | ataagacaca | 12960 |
| cacacacaca | tactccagca | gcaaccacga | gtttcaaggc | tgacagctgca | aggaggaatc | 13020 |
| tgagttcatc | tcattgatat | ggatacactg | cctcctgcaa | gccaacgccg  | aacgtgtggg | 13080 |
| cgcatttatg | caatttaacc | accaggtgat | gctagtgatg | ccgtattaat  | tgcgatatct | 13140 |
| gctctgaagg | acagc      |            |            |             |            | 13155 |

//

```

ID      LR860659; SV 1; linear; mRNA; STD; VRT; 2118 BP.
XX
ST      * private
XX
AC      LR860659;
XX
PR      Project:PRJEB34342;
XX
DE      Mugil cephalus follicle-stimulating hormone receptor, variant A1, female
DE      form (FSHRX) mRNA, complete cds.
XX
KW      .
XX
OS      Mugil cephalus (flathead mullet)
OC      Eukaryota; Metazoa; Chordata; Craniata; Vertebrata; Euteleostomi;
OC      Actinopterygii; Neopterygii; Teleostei; Neoteleostei; Acanthomorphata;
OC      Ovalentaria; Mugilomorphae; Mugilidae; Mugil.
XX
RN      [1]
RA      Seroussi E.;
RT      ;
RL      Submitted (12-JUL-2020) to the INSDC.
RL      ARO, Agricultural Research Organization, Institute of Animal Science,
RL      P.O.B. 6, Bet-Dagan, 50250, Israel
XX
CC      ##Evidence-Data-START##
CC      DNaseq                ::sample support SAMEA5968614
CC      ##Evidence-Data-END##
CC      ##Assembly-Data-START##
CC      Assembly Method      :: GAP5
CC      Coverage              :: 15X
CC      Sequencing Technology :: Illumina, HiSeq 2500
CC      ##Assembly-Data-END##
XX
FH      Key                  Location/Qualifiers
FH
FT      source                1..2118
FT                        /organism="Mugil cephalus"
FT                        /mol_type="mRNA"

```

```

FT          /tissue_type="fin"
FT          /note="predicted"
FT          /db_xref="taxon:48193"
FT  CDS      1..2118
FT          /codon_start=1
FT          /transl_table=1
FT          /gene="FSHRX"
FT          /translation="MMTVTILVMLKFAMIKMEAASAPGFELGFRPGRETVLAKQTCFLV
FT          GPGAMAIPSNMSSSTQCLELKTQIRVIPKGALTSLOHLRRLNILQNDELQSI SDLAFV
FT          GLPRLTYILISENVALERIGASAFSDLPELVEITITKSRNLHFIHSDAFRNLMLKLRFMT
FT          ISYTGLKIFPNFSQVHSTYNEFQLHLQENS DLKKVPANAFRGLCTKTIKKIWLTRNGIK
FT          EVASDAFNGTKMQRLFLKGNRQLTHMSPNAFAGSSELEVLDISQ TALSSSLPGSILGGLK
FT          RLIAESAKNLKKLP PPRFFTKLHQANLTYSSHCCAFQNMQRNKS RNNHNLCAIPEAKNE
FT          PFFYRAHCSTSITCSPVPDDFNP CEDIMSAVPLRILIWIISILALLGN AVVVVLVLLSSR
FT          SKLTVPRFLMCHLAFADLCMGIYLAVIAAVDMLYRGKYYNHSIDWQ EGLGCKAAGFFSV
FT          FASELSVFTLTAITVERWHTITHALRLDRKLRLRHACIIMTAGWIFAAAAALLPTVGVS
FT          SYSKVSICLPM DVEDLVSQVYVVSLLLLLNILAFLCVCGCYLSIYLTFRNPSSVPAHADT
FT          RVAQRMAVLIFTDFICMAPISFFAVSAALKTPLITVSESKVLLVLFYPINSCANPFLYA
FT          FFTRTFRDRDFFLAARFGLFKTRAQIYRTETSSCQQPAWTSSRSSRVAMYS LANTLSLD
FT          ACVDSQSSKSW"
XX

```

```

SQ  Sequence 2118 BP; 461 A; 673 C; 504 G; 480 T; 0 other;
    atgatgacgg tgacgatact ggtgatgctg aagtttgcg a tgataaagat ggaggcgggcc      60
    tcggcacctg gctttgagct gggcttcaga cccggacggg agaccgtttt ggccaaacaa      120
    acctgcttcc tgggtgggacc cggggccatg gcgataccct ccaacatgtc cagcagcacc      180
    cagtgccttg aactcaagca gacacagatc agagtgattc ccaaggggtgc cctcaccagc      240
    ctgcagcacc tcaggagact gaacatactg cagaatgacg aactgcagag tatcagtgat      300
    ctgcgcttcg tcggcctccc tcgtctcact tacatcttaa tatcagaaaa tgttgcttta      360
    gaaagaattg gagcttccgc cttctctgat ctccctgaac tcgttgagat aaccataaca      420
    aagtcaagaa acctgcattt catccactca gacgccttca gaaacctcat gaaactaagg      480
    tttatgacca tctcctacac cggcctgaaa atctttccca acttttccca ggtccactcc      540
    acctacaatg aatttcagct tcacctgcag gagaacagcg acttaaagaa agtccccgcc      600
    aatgccttca gaggcctctg cactaaaact atcaagaaga tatggctcac cagaaatggc      660
    atcaaggagg tggcaagtga cgctttcaat ggaacaaaga tgcaaagact atttctgaaa      720
    ggcaatcggc agcttactca catgagtcct aacgccttcg cgggttccag tgagttggaa      780
    gtgcttgaca tctcccaaac agcgctcagc tctctgccag gctccatcct cgggggactc      840
    aagagactga tcgcagagtc agccaagaac ctgaagaagc ttcctcctcc tcggttcttc      900
    accaaactgc accaggccaa cctgacgtac tcgtctcact gctgcgcctt ccagaacatg      960
    cagagaaaca aatcaaggaa caaccacaac ctgtgcgcta taccagaggc gaagaatgag     1020
    cccttcttct acagggcgca ctgctccacc tccatcacct gcagcccggg gccggacgac     1080
    ttaaacccgt gtgaggacat catgtccgct gtccccttac gcatectcat ctggatcatc     1140
    tctatcctcg cgctactggg gaacgcagtg gttgtccttg tattgttgag cagcagatcg     1200
    aagctcaccg tccccggtt cctcatgtgc cacttggcct tcgctgacct ctgcatggga     1260
    atctacctgg cagtcatagc agccgtagac atgttatatc gtggcaagta ctacaaccac     1320
    tccatagact ggcaggaggg cttgggctgc aaggctgccg gcttcttctc ggtgtttgcc     1380
    agcgagctgt cgggtgttcac gttgacggcg atcaccgtgg agcgctggca caccatcacg     1440
    catgccttgc gcctggaccg taagcttcgc ctgagacacg cctgcatcat catgacggcc     1500
    ggctggatct tcgccgcggc ggccgcgctt ctgcccacgg tcgggggtcag cagctacagc     1560
    aaagtgagca tctgcttgcc catggatgtg gaggatctgg tgtcccaggc ctatgtagtg     1620
    tccctgctcc tctcaacat cctggccttc ctctgtgtgt gcggtgcta cctcagcatc     1680
    tacctgacct tcgcgaatcc ctcttcgggtg ccggcccacg ccgacacgcg cgtggctcaa     1740
    cgcattggccg tctcatctt caccgacttc atctgcatgg ccccgatctc cttcttcgcc     1800
    gtctcggccg cgctcaagac cccctcatc accgtctcgg aatctaaggt cctcctggtc     1860
    ctgttctacc ccatcaactc gtgcgccaac cccttcctgt acgccttctt caccgcgacc     1920
    ttccggcggg acttcttttt cctggcggct cgcttcggcc tgtttaagac tcgggcgcag     1980
    atttaccgga cagagacctc ttctgttcag cagccagcat ggacctcttc gaggagcagc     2040
    cgcgtggcaa tgtactcctt ggccaacacc ttgagcctgg acgcgtgcgt agactcccag     2100
    tcgtccaagt catggtag      2118

```

//

ID LR860660; SV 1; linear; mRNA; STD; VRT; 2118 BP.

XX

ST \* private

XX

```

AC   LR860660;
XX
PR   Project:PRJEB12265;
XX
DE   Mugil cephalus follicle-stimulating hormone receptor, variant mX, female
DE   form (FSHRX) mRNA, complete cds.
XX
KW   .
XX
OS   Mugil cephalus (flathead mullet)
OC   Eukaryota; Metazoa; Chordata; Craniata; Vertebrata; Euteleostomi;
OC   Actinopterygii; Neopterygii; Teleostei; Neoteleostei; Acanthomorphata;
OC   Ovalentaria; Mugilomorphae; Mugilidae; Mugil.
XX
RN   [1]
RA   Seroussi E.;
RT   ;
RL   Submitted (13-JUL-2020) to the INSDC.
RL   ARO, Agricultural Research Organization, Institute of Animal Science,
RL   P.O.B. 6, Bet-Dagan, 50250, Israel
XX
CC   ##Evidence-Data-START##
CC   DNaseq                ::sample support SAMEA3719480
CC   ##Evidence-Data-END##
CC   ##Assembly-Data-START##
CC   Assembly Method      :: GAP5
CC   Coverage             :: 15X
CC   Sequencing Technology :: Illumina, HiSeq 2500
CC   ##Assembly-Data-END##
XX
FH   Key                  Location/Qualifiers
FH
FT   source                1..2118
FT                          /organism="Mugil cephalus"
FT                          /mol_type="mRNA"
FT                          /tissue_type="fin"
FT                          /note="predicted"
FT                          /db_xref="taxon:48193"
FT   CDS                   1..2118
FT                          /codon_start=1
FT                          /transl_table=1
FT                          /gene="FSHRX"
FT                          /translation="MMTVTILVMLKFAMIKMEAASAPGFELGFRPGRETVLAKQTCFLV
FT                          GPGAMAIPSNMSSSTQCLELKQTQIRVIPKGALTSLOHLRRLNILQNDELQISDLAFV
FT                          GLPRLTYILISENVALERIGASAFSDLPPELVEITITKSRNLHFIHSDAFRNLMLKLRFMT
FT                          ISYTGLKIFPNFSQVHSTYNEFQLHLQENSDLKKVPANAFRGLCTKTIKKIWLTRNGIK
FT                          EVASDAFNGTKMQRLFLKGNRQLTHMSPNAFAGSSELEVLDISQ TALSSLPGSILGGLK
FT                          RLIAESAKNLKKLP PPRFFTKLHQANLTYSSHCCAFQNMQRNKSRRNNHNLCAIPEAKNE
FT                          PFFYRAHCSTSITCSPVPDDFNPCEDIMSAVPLRILIWIISILALLGNVVLVLLSSR
FT                          SKLTVPRFLMCHLAFADLCMGIYLAVIAAVDMLYRGKYNNHSIDWQEGLGCKAAGFFSV
FT                          FASELSVFTLTAITVERWHTITHALRLDRKLRLRHACIIMTAGWIFAAAAALLPTVGVS
FT                          SYSKVSICLPMDDVEDLVSQVYVVSLLLLNILAFLCVCGCYLSIYLTFRNPSSVPAHADT
FT                          RVAQRMAVLIFTDFICMAPISFFAVSAALKTPLITVSESKVLLVLFYPINSCANPFLYA
FT                          FFTRTFRDRDFFFLAARFGLFKTRAQIYRTETSSCQQPAWTSSRSSRVMTMYSLANTLSLD
FT                          ACVDSQSSKSW"
XX
SQ   Sequence 2118 BP; 462 A; 673 C; 503 G; 480 T; 0 other;
      atgatgacgg tgacgatact ggtgatgctg aagtttgcca tgataaagat ggaggcggcc          60
      tcggcacctg gctttgagct gggcttcaga cccggacggg agaccgtttt ggccaaacaa          120
      acctgcttcc tgggtgggacc cggggccatg gcgataccct ccaacatgtc cagcagcacc          180
      cagtgccttg aactcaagca gacacagatc agagtgattc ccaaggggtg cctcaccagc          240
      ctgcagcacc tcaggagact gaacatactg cagaatgacg aactgcagag tatcagtgat          300
      ctcgccttcg tcggcctccc tcgtctcact tacatcttaa tatcagaaaa tgttgcttta          360
      gaaagaattg gagcttccgc cttctctgat ctccctgaac tcgttgagat aaccataaca          420

```

|             |            |             |            |            |            |      |
|-------------|------------|-------------|------------|------------|------------|------|
| aagtcaagaa  | acctgcattt | catccactca  | gacgccttca | gaaacctcat | gaaactaagg | 480  |
| tttatgacca  | tctcctacac | cggcctgaaa  | atctttccca | acttttccca | ggtccactcc | 540  |
| acctacaatg  | aatttcagct | tcacctgcag  | gagaacagcg | acttaaagaa | agtccccgcc | 600  |
| aatgccttca  | gaggcctctg | cactaaaact  | atcaagaaga | tatggctcac | cagaaatggc | 660  |
| atcaaggagg  | tggcaagtga | cgctttcaat  | ggaacaaaga | tgcaaagact | atttctgaaa | 720  |
| ggcaatcggc  | agcttactca | catgagtccc  | aacgccttcg | cgggttccag | tgagttggaa | 780  |
| gtgcttgaca  | tctcccaaac | agcgctcagc  | tctctgccag | gctccatcct | cgggggactc | 840  |
| aagagactga  | tcgcagagtc | agccaagaac  | ctgaagaagc | tctctcctcc | tcggttcttc | 900  |
| accaaactgc  | accaggccaa | cctgacgtac  | tcgtctcact | gctgcgcctt | ccagaacatg | 960  |
| cagagaaaca  | aatcaaggaa | caaccacaac  | ctgtgcgcta | taccagaggc | gaagaatgag | 1020 |
| cccttcttct  | acagggcgca | ctgctccacc  | tccatcacct | gcagcccggg | gccggacgac | 1080 |
| tttaaccctg  | gtgaggacat | catgtccgct  | gtccccttac | gcatectcat | ctggatcatc | 1140 |
| tctatcctcg  | cgctactggg | gaacgcagtg  | gttgtccttg | tattgttgag | cagcagatcg | 1200 |
| aagctcaccg  | ttccccgttt | cctcatgtgc  | cacttggcct | tcgctgacct | ctgcatggga | 1260 |
| atctacctgg  | cagtcatagc | agccgtagac  | atgttatatc | gtggcaagta | ctacaaccac | 1320 |
| tccatagact  | ggcaggaggg | cttgggctgc  | aaggctgccg | gcttcttctc | ggtgtttgcc | 1380 |
| agcgagctgt  | cggtgttcac | gttgacggcg  | atcaccgtgg | agcgctggca | caccatcacg | 1440 |
| catgccctgc  | gcctggaccg | taagcttcgc  | ctgagacacg | cctgcatcat | catgacggcc | 1500 |
| ggctggatct  | tcgccgcggc | ggccgcgctt  | ctgcccacgg | tcggggtcag | cagctacagc | 1560 |
| aaagtgagca  | tctgcttgcc | catggatgtg  | gaggatctgg | tgtcccaggt | ctatgtagtg | 1620 |
| tccctgctcc  | tcctcaacat | cctggccttc  | ctctgtgtgt | gcggtgcta  | cctcagcatc | 1680 |
| tacctgacct  | tcgcaatcc  | ctcttcgggtg | ccggcccacg | ccgacacgcg | cgtgggtcaa | 1740 |
| cgcattggccg | tcctcatctt | caccgacttc  | atctgcatgg | ccccgatctc | cttcttcgcc | 1800 |
| gtctcggccg  | cgctcaagac | ccccctcate  | accgtctcgg | aatctaaggt | cctcctggtc | 1860 |
| ctgttctacc  | ccatcaactc | gtgcgccaac  | cccttcctgt | acgccttctt | caccgcgacc | 1920 |
| ttccggcggg  | acttcttttt | cctggcggtc  | cgcttcggcc | tgtttaagac | tcgggcgcag | 1980 |
| atttaccgga  | cagagacctc | ttcctgtcag  | cagccagcat | ggacctcttc | gaggagcagc | 2040 |
| cgcgtgacaa  | tgtactcctt | ggccaacacc  | ttgagcctgg | acgcgtgcgt | agactcccag | 2100 |
| tcgtccaagt  | catggtag   |             |            |            |            | 2118 |

//
